# Supplementary material for: Network Pharmacology and Experimental Validation to Investigate the Antidepressant Potential of Atractylodes lancea (Thunb.) DC
Source: MDPI journal article supplement (doi:10.3390/life12111925), 2022-11-18
Supplement: s1 [file s1]

**Table S1.** Constituents of AL from TCMSP and literature.

| Mol ID    | Molecule Name                                                               | MW     | OB (%) | Caco-2 | BBB   | DL   | Source |
|-----------|-----------------------------------------------------------------------------|--------|--------|--------|-------|------|--------|
| MOL013068 | Oroxindin                                                                   | 459.41 | 7.07   | -1.68  | -2.15 | 0.77 | TCMSP  |
| MOL000184 | Stigmastenone                                                               | 412.77 | 39.25  | 1.42   | 1.22  | 0.76 | TCMSP  |
| MOL000186 | Stigmasterol 3-O- $\beta$ -D-glucopyranoside_qt                             | 412.77 | 43.83  | 1.31   | 0.9   | 0.76 | TCMSP  |
| MOL000094 | Daucosterol_qt                                                              | 414.79 | 36.91  | 1.3    | 0.87  | 0.76 | TCMSP  |
| MOL000092 | Daucosterin_qt                                                              | 414.79 | 36.91  | 1.42   | 1.15  | 0.76 | TCMSP  |
| MOL000449 | Stigmasterol                                                                | 412.77 | 43.83  | 1.44   | 1     | 0.76 | [1]    |
| MOL000088 | $\beta$ -sitosterol 3-O-glucoside_qt                                        | 414.79 | 36.91  | 1.3    | 0.91  | 0.75 | TCMSP  |
| MOL000085 | $\beta$ -daucosterol_qt                                                     | 414.79 | 36.91  | 1.3    | 0.88  | 0.75 | TCMSP  |
| MOL000095 | $\Delta$ -7-stigmastenol                                                    | 416.81 | 25.32  | 1.31   | 0.98  | 0.75 | TCMSP  |
| MOL000086 | (24S)-5 $\beta$ -Stigmastan-3 $\beta$ -ol                                   | 416.81 | 25.32  | 1.41   | 1.18  | 0.75 | TCMSP  |
| MOL000358 | $\beta$ -sitosterol                                                         | 414.79 | 36.91  | 1.32   | 0.99  | 0.75 | [1]    |
| MOL000185 | Stigmasterol 3-O- $\beta$ -D-glucopyranoside                                | 574.93 | 21.32  | -0.22  | -0.93 | 0.63 | TCMSP  |
| MOL000084 | $\beta$ -daucosterol                                                        | 576.95 | 20.63  | -0.19  | -0.88 | 0.63 | TCMSP  |
| MOL000093 | Daucosterol                                                                 | 576.95 | 20.63  | -0.26  | -0.97 | 0.63 | TCMSP  |
| MOL000091 | Daucosterin                                                                 | 576.95 | 20.63  | -0.28  | -1    | 0.63 | TCMSP  |
| MOL000087 | $\beta$ -sitosterol 3-O-glucoside                                           | 576.95 | 20.63  | -0.45  | -1.18 | 0.62 | TCMSP  |
| MOL000192 | 2-(1,4a-dimethyl-2,3-dihydroxydecahydronaphthalen-7-yl) isopropyl glucoside | 418.59 | 5.96   | -1.12  | -1.86 | 0.47 | TCMSP  |
| MOL000190 | 3,5-dimethoxy-4-glucosyloxyphenylallyl alcohol                              | 372.41 | 29     | -1.04  | -1.59 | 0.32 | TCMSP  |
| MOL000173 | Wogonin                                                                     | 284.28 | 30.68  | 0.79   | 0.04  | 0.23 | TCMSP  |
| MOL000182 | Atractyloyn                                                                 | 314.46 | 5.2    | 0.73   | -0.98 | 0.23 | TCMSP  |
| MOL000188 | 3 $\beta$ -acetoxyatractylone                                               | 274.39 | 40.57  | 1.22   | 1.04  | 0.22 | TCMSP  |
| MOL000179 | 2-Hydroxyisoxypyl-3-hydroxy-7-isopentene-2,3-dihydrobenzofuran-5-carboxylic | 306.39 | 45.2   | -0.34  | -0.91 | 0.2  | TCMSP  |
| MOL000178 | Atractylenolide III                                                         | 248.35 | 31.66  | 0.75   | 0.64  | 0.17 | TCMSP  |
| MOL000187 | Butenolide B                                                                | 234.32 | 61     | 0.65   | 0.45  | 0.15 | TCMSP  |
| MOL000043 | Atractylenolide I                                                           | 230.33 | 37.37  | 1.3    | 1.29  | 0.15 | TCMSP  |
| MOL000167 | 3 $\beta$ -hydroxyatractylone                                               | 232.35 | 21.17  | 1.18   | 0.97  | 0.15 | TCMSP  |
| MOL000044 | Atractylenolide II                                                          | 232.35 | 47.5   | 1.3    | 1.37  | 0.15 | TCMSP  |

**Table S1.** (continued)

| Mol ID    | Molecule Name                                                      | MW     | OB (%) | Caco-2 | BBB  | DL   | Source |
|-----------|--------------------------------------------------------------------|--------|--------|--------|------|------|--------|
| MOL000164 | Atractylone                                                        | 216.35 | 33.91  | 1.74   | 1.83 | 0.13 | TCMSP  |
| MOL000189 | Acetyl atractylodinol                                              | 240.27 | 25.47  | 1.42   | 0.69 | 0.13 | TCMSP  |
| MOL000194 | Patchoulene                                                        | 204.39 | 51.71  | 1.8    | 2.21 | 0.11 | TCMSP  |
| MOL000175 | Cyperene                                                           | 204.39 | 51.1   | 1.81   | 2.13 | 0.11 | TCMSP  |
| MOL000060 | Selina-4(14),7(11)-dien-8-one                                      | 218.37 | 32.31  | 1.42   | 1.57 | 0.1  | TCMSP  |
| MOL000032 | $\beta$ -Eudesmol                                                  | 222.41 | 26.09  | 1.32   | 1.38 | 0.1  | TCMSP  |
| MOL000193 | (Z)-caryophyllene                                                  | 204.39 | 30.29  | 1.82   | 2.15 | 0.09 | TCMSP  |
| MOL000165 | 2-[(2S,5S,6S)-6,10-dimethylspiro[4.5]dec-9-en-2-yl]propan-2-ol     | 222.41 | 37.62  | 1.44   | 1.53 | 0.09 | TCMSP  |
| MOL000171 | Guaiol                                                             | 222.41 | 38.77  | 1.36   | 1.47 | 0.09 | TCMSP  |
| MOL000058 | Hinesol                                                            | 222.41 | 38.59  | 1.34   | 1.42 | 0.09 | [1-3]  |
| MOL000162 | $\beta$ -Chamigrene                                                | 204.39 | 31.99  | 1.82   | 2.07 | 0.08 | TCMSP  |
| MOL000034 | 2-[(1R,3S,4S)-3-isopropenyl-4-methyl-4-vinylcyclohexyl]propan-2-ol | 222.41 | 19.03  | 1.37   | 1.46 | 0.07 | TCMSP  |
| MOL000169 | $\alpha$ -Guaiene                                                  | 204.39 | 25.93  | 1.81   | 2.09 | 0.07 | TCMSP  |
| MOL000170 | Guaiene                                                            | 204.39 | 28.21  | 1.83   | 2.03 | 0.07 | TCMSP  |
| MOL000174 | (2E,8E)-9-(2-furyl)nona-2,8-dien-4,6-diyn-1-ol                     | 198.23 | 47.6   | 1.33   | 0.14 | 0.07 | TCMSP  |
| MOL000166 | ZINC01609418                                                       | 222.41 | 21.62  | 1.41   | 1.37 | 0.07 | TCMSP  |
| MOL012364 | Elemol                                                             | 222.41 | 31.91  | 1.28   | 1.32 | 0.07 | [1]    |
| MOL000191 | 3,5-dimethoxy-4-glucosyloxyphenylallyl alcohol_qt                  | 210.25 | 72.16  | 0.61   | 0.2  | 0.06 | TCMSP  |
| MOL000024 | $\alpha$ -humulene                                                 | 204.39 | 22.98  | 1.88   | 2.08 | 0.06 | TCMSP  |
| MOL000027 | $\alpha$ -Curcumene                                                | 202.37 | 4.68   | 1.93   | 1.99 | 0.06 | [3]    |
| MOL000163 | Atractylodin                                                       | 182.23 | 44.49  | 2      | 1.03 | 0.05 | TCMSP  |
| MOL000168 | ()-2-Carene                                                        | 136.26 | 46.69  | 1.89   | 2.27 | 0.04 | TCMSP  |
| MOL000114 | Vanillic acid                                                      | 168.16 | 35.47  | 0.43   | 0.09 | 0.04 | TCMSP  |
| MOL000172 | Furol                                                              | 96.09  | 34.35  | 1.08   | 1.51 | 0.01 | TCMSP  |

**Table S2.** Targets of AL compounds.

| Gene          | Compound                                                                       |
|---------------|--------------------------------------------------------------------------------|
| <i>ACHE</i>   | MOL000188                                                                      |
| <i>ADH1C</i>  | MOL000449                                                                      |
| <i>ADRA1A</i> | MOL000188, MOL000449, MOL000358                                                |
| <i>ADRA1B</i> | MOL000449, MOL000194, MOL000358                                                |
| <i>ADRA2A</i> | MOL000449                                                                      |
| <i>ADRB1</i>  | MOL000449                                                                      |
| <i>ADRB2</i>  | MOL000188, MOL000173, MOL000449, MOL000358                                     |
| <i>AHSA1</i>  | MOL000173                                                                      |
| <i>AKR1B1</i> | MOL000449                                                                      |
| <i>AR</i>     | MOL000173, MOL000188,                                                          |
| <i>BAX</i>    | MOL000173, MOL000358                                                           |
| <i>BBC3</i>   | MOL000173                                                                      |
| <i>BCL2</i>   | MOL000173, MOL000358                                                           |
| <i>CALM2</i>  | MOL000173                                                                      |
| <i>CASP3</i>  | MOL000173, MOL000358                                                           |
| <i>CASP8</i>  | MOL000358                                                                      |
| <i>CASP9</i>  | MOL000173, MOL000358                                                           |
| <i>CCL2</i>   | MOL000173                                                                      |
| <i>CCND1</i>  | MOL000173                                                                      |
| <i>CDK2</i>   | MOL000173                                                                      |
| <i>CDKN1B</i> | MOL000173                                                                      |
| <i>CHEK1</i>  | MOL000173                                                                      |
| <i>CHRM1</i>  | MOL000188, MOL000060, MOL000449, MOL000194, MOL000358                          |
| <i>CHRM2</i>  | MOL000188, MOL000060, MOL000449, MOL000194, MOL000358                          |
| <i>CHRM3</i>  | MOL000188, MOL000060, MOL000449, MOL000194, MOL000358, MOL000175               |
| <i>CHRM4</i>  | MOL000358                                                                      |
| <i>CHRNA2</i> | MOL000358, MOL000194                                                           |
| <i>CHRNA7</i> | MOL000060, MOL000032, MOL000449, MOL000178, MOL000043, MOL000044,<br>MOL000358 |
| <i>CTRB1</i>  | MOL000449                                                                      |
| <i>CYP101</i> | MOL000358                                                                      |
| <i>DPP4</i>   | MOL000188, MOL000173                                                           |
| <i>DRD1</i>   | MOL000188, MOL000358                                                           |

**Table S2.** (continued)

| <b>Gene</b>   | <b>Compound</b>                                                                                                            |
|---------------|----------------------------------------------------------------------------------------------------------------------------|
| <i>EIF6</i>   | MOL000173                                                                                                                  |
| <i>ESR1</i>   | MOL000173                                                                                                                  |
| <i>F2</i>     | MOL000188                                                                                                                  |
| <i>FN1</i>    | MOL000173                                                                                                                  |
| <i>GABRA1</i> | MOL000175, MOL000060, MOL000188, MOL000449, MOL000358, MOL000173,<br>MOL000178, MOL000043, MOL000044, MOL000194, MOL000032 |
| <i>GABRA2</i> | MOL000060, MOL000043, MOL000044, MOL000358                                                                                 |
| <i>GABRA3</i> | MOL000060, MOL000044, MOL000449, MOL000358                                                                                 |
| <i>GABRA5</i> | MOL000358                                                                                                                  |
| <i>GABRA6</i> | MOL000060, MOL000178                                                                                                       |
| <i>GRM2</i>   | MOL000178, MOL000044                                                                                                       |
| <i>GSK3B</i>  | MOL000173                                                                                                                  |
| <i>HSP90</i>  | MOL000358, MOL000173                                                                                                       |
| <i>HTR2A</i>  | MOL000188, MOL000449, MOL000358                                                                                            |
| <i>IGHG1</i>  | MOL000449                                                                                                                  |
| <i>IL1B</i>   | MOL000043                                                                                                                  |
| <i>IL6</i>    | MOL000173, MOL000043                                                                                                       |
| <i>IL8</i>    | MOL000173                                                                                                                  |
| <i>JUN</i>    | MOL000358, MOL000173                                                                                                       |
| <i>KCNH2</i>  | MOL000358                                                                                                                  |
| <i>LTA4H</i>  | MOL000449                                                                                                                  |
| <i>MAOA</i>   | MOL000449                                                                                                                  |
| <i>MAOB</i>   | MOL000449                                                                                                                  |
| <i>MAP2</i>   | MOL000358                                                                                                                  |
| <i>MAPK14</i> | MOL000173                                                                                                                  |
| <i>MCL1</i>   | MOL000173                                                                                                                  |
| <i>MMP1</i>   | MOL000173                                                                                                                  |
| <i>NCOA1</i>  | MOL000449                                                                                                                  |
| <i>NCOA2</i>  | MOL000175, MOL000449, MOL000358, MOL000194                                                                                 |
| <i>NOS2</i>   | MOL000173                                                                                                                  |
| <i>NOS3</i>   | MOL000188                                                                                                                  |
| <i>NR3C2</i>  | MOL000449                                                                                                                  |
| <i>OPRM1</i>  | MOL000188, MOL000358                                                                                                       |

**Table S2.** (continued)

| <b>Gene</b>   | <b>Compound</b>                                                  |
|---------------|------------------------------------------------------------------|
| <i>TEP1</i>   | MOL000173                                                        |
| <i>TGFB1</i>  | MOL000358                                                        |
| <i>TNF</i>    | MOL000043, MOL000173                                             |
| <i>TP53</i>   | MOL000173                                                        |
| <i>VEGFA</i>  | MOL000043                                                        |
| <i>VEGFR2</i> | MOL000173                                                        |
| <i>PDE3A</i>  | MOL000188, MOL000358, MOL000173                                  |
| <i>PGF</i>    | MOL000043                                                        |
| <i>PGR</i>    | MOL000449, MOL000184, MOL000085, MOL000095, MOL000086            |
| <i>PIK3CG</i> | MOL000358, MOL000173                                             |
| <i>PLAU</i>   | MOL000449                                                        |
| <i>PON1</i>   | MOL000358                                                        |
| <i>PPARG</i>  | MOL000173                                                        |
| <i>PRKACA</i> | MOL000188, MOL000449, MOL000173                                  |
| <i>PRKCA</i>  | MOL000358                                                        |
| <i>PRKCD</i>  | MOL000173                                                        |
| <i>PRSSI</i>  | MOL000173                                                        |
| <i>PTGER3</i> | MOL000173                                                        |
| <i>PTGSI</i>  | MOL000449, MOL000358, MOL000173                                  |
| <i>PTGS2</i>  | MOL000175, MOL000060, MOL000188, MOL000449, MOL000358, MOL000173 |
| <i>RELA</i>   | MOL000173                                                        |
| <i>RXRA</i>   | MOL000188, MOL000449, MOL000173                                  |
| <i>SCN5A</i>  | MOL000188, MOL000449, MOL000358, MOL000173                       |
| <i>SLC6A2</i> | MOL000060, MOL000188, MOL000449                                  |
| <i>SLC6A3</i> | MOL000188, MOL000449                                             |
| <i>SLC6A4</i> | MOL000188, MOL000358                                             |

**Table S3.** 260 genes associated with depression acquired from DisGeNET(Disease ID: C0011570, score  $\geq 0.3$ )

| Depression-related targets |                 |               |                |              |                 |                 |
|----------------------------|-----------------|---------------|----------------|--------------|-----------------|-----------------|
| <i>A2M</i>                 | <i>CDKN2A</i>   | <i>DPYSL2</i> | <i>GRIN2A</i>  | <i>IL1A</i>  | <i>NTRK2</i>    | <i>SFRP1</i>    |
| <i>AANAT</i>               | <i>CHAT</i>     | <i>DRD1</i>   | <i>GRIN2B</i>  | <i>IL1B</i>  | <i>NTS</i>      | <i>SGCE</i>     |
| <i>ABCB1</i>               | <i>CHRM2</i>    | <i>DRD2</i>   | <i>GRK2</i>    | <i>IL6</i>   | <i>OAS2</i>     | <i>SLC18A1</i>  |
| <i>ADCY5</i>               | <i>CHRNA2</i>   | <i>DRD3</i>   | <i>GRM1</i>    | <i>IL6R</i>  | <i>OPRK1</i>    | <i>SLC18A2</i>  |
| <i>ADCY7</i>               | <i>CHRNA4</i>   | <i>DRD4</i>   | <i>GRM7</i>    | <i>IMPA2</i> | <i>OPRM1</i>    | <i>SLC1A1</i>   |
| <i>ADCY8</i>               | <i>CHRNA6</i>   | <i>DTNBP1</i> | <i>GRN</i>     | <i>KCNJ6</i> | <i>OR7D4</i>    | <i>SLC1A2</i>   |
| <i>ADCYAP1</i>             | <i>CHRNB3</i>   | <i>DUSP1</i>  | <i>GRPR</i>    | <i>KCNK2</i> | <i>OXT</i>      | <i>SLC29A3</i>  |
| <i>ADCYAP1R1</i>           | <i>CLOCK</i>    | <i>DUSP4</i>  | <i>GSK3B</i>   | <i>LDHA</i>  | <i>OXTR</i>     | <i>SLC6A1</i>   |
| <i>ADRA2A</i>              | <i>CMKLR1</i>   | <i>DUSP6</i>  | <i>GSTM1</i>   | <i>LEP</i>   | <i>P2RX7</i>    | <i>SLC6A2</i>   |
| <i>ADRB1</i>               | <i>CNR1</i>     | <i>EGR3</i>   | <i>GSTT1</i>   | <i>LGII</i>  | <i>PCLO</i>     | <i>SLC6A3</i>   |
| <i>AGO1</i>                | <i>CNR2</i>     | <i>ERBB3</i>  | <i>GTS</i>     | <i>LIF</i>   | <i>PDE1B</i>    | <i>SLC6A4</i>   |
| <i>AGT</i>                 | <i>CNTF</i>     | <i>ESR1</i>   | <i>GYPE</i>    | <i>LTA4H</i> | <i>PDE4A</i>    | <i>SLCO1C1</i>  |
| <i>AKT1</i>                | <i>COMT</i>     | <i>FEV</i>    | <i>HCN1</i>    | <i>M6PR</i>  | <i>PDE4B</i>    | <i>SNAP25</i>   |
| <i>ALK</i>                 | <i>COX2</i>     | <i>FGF17</i>  | <i>HCRT</i>    | <i>MAOA</i>  | <i>PDE4D</i>    | <i>SNCA</i>     |
| <i>ANKK1</i>               | <i>CPLX1</i>    | <i>FGF20</i>  | <i>HCRT1</i>   | <i>MAOB</i>  | <i>PDYN</i>     | <i>SOD1</i>     |
| <i>APP</i>                 | <i>CPLX2</i>    | <i>FGFR1</i>  | <i>HDAC2</i>   | <i>MAPK3</i> | <i>PENK</i>     | <i>SOD2</i>     |
| <i>APRT</i>                | <i>CREB1</i>    | <i>FGFR2</i>  | <i>HDAC4</i>   | <i>MAPK8</i> | <i>PER2</i>     | <i>SRD5A1</i>   |
| <i>AQP4</i>                | <i>CRH</i>      | <i>FKBP5</i>  | <i>HDAC5</i>   | <i>MC1R</i>  | <i>PER3</i>     | <i>STMN1</i>    |
| <i>AR</i>                  | <i>CRHBP</i>    | <i>FOLH1</i>  | <i>HDAC6</i>   | <i>MC4R</i>  | <i>PEX5L</i>    | <i>SYN1</i>     |
| <i>ARHGEF10</i>            | <i>CRHR1</i>    | <i>FOS</i>    | <i>HDAC9</i>   | <i>MCHR1</i> | <i>PFKFB3</i>   | <i>TAC1</i>     |
| <i>ARNTL</i>               | <i>CRHR2</i>    | <i>FTO</i>    | <i>HIF1A</i>   | <i>MED12</i> | <i>PMCH</i>     | <i>TACR1</i>    |
| <i>ARRB2</i>               | <i>CRY1</i>     | <i>GABRA3</i> | <i>HOMER1</i>  | <i>MTHFR</i> | <i>PNOC</i>     | <i>TBX19</i>    |
| <i>ARTN</i>                | <i>CRY2</i>     | <i>GABRA6</i> | <i>HP</i>      | <i>MTR</i>   | <i>POMC</i>     | <i>TH</i>       |
| <i>ASMT</i>                | <i>CSMD2</i>    | <i>GABRB3</i> | <i>HSD11B1</i> | <i>NCAM1</i> | <i>PPP1R1B</i>  | <i>TIMELESS</i> |
| <i>ATF3</i>                | <i>CXCL8</i>    | <i>GAD1</i>   | <i>HTR1A</i>   | <i>NEFM</i>  | <i>PPP3CC</i>   | <i>TLE1</i>     |
| <i>ATF4</i>                | <i>CYP2C19</i>  | <i>GAL</i>    | <i>HTR1B</i>   | <i>NGF</i>   | <i>PRKCI</i>    | <i>TNF</i>      |
| <i>ATP1A3</i>              | <i>CYP2D6</i>   | <i>GAP43</i>  | <i>HTR2A</i>   | <i>NGFR</i>  | <i>PSEN1</i>    | <i>TNFRSF1A</i> |
| <i>ATP2A2</i>              | <i>DAOA</i>     | <i>GFAP</i>   | <i>HTR2C</i>   | <i>NOS2</i>  | <i>PTGS2</i>    | <i>TNFRSF1B</i> |
| <i>ATXN3</i>               | <i>DAOA-AS1</i> | <i>GH1</i>    | <i>HTR3A</i>   | <i>NOS3</i>  | <i>PYY</i>      | <i>TPH1</i>     |
| <i>BAG1</i>                | <i>DBH</i>      | <i>GLO1</i>   | <i>HTR3B</i>   | <i>NPAS2</i> | <i>RAC1</i>     | <i>TPH2</i>     |
| <i>BDNF</i>                | <i>DEAF1</i>    | <i>GLUL</i>   | <i>HTR4</i>    | <i>NPS</i>   | <i>RELN</i>     | <i>TRH</i>      |
| <i>BICC1</i>               | <i>DGCR8</i>    | <i>GNB3</i>   | <i>HTR7</i>    | <i>NPSR1</i> | <i>REN</i>      | <i>TTR</i>      |
| <i>BRCA1</i>               | <i>DGKB</i>     | <i>GPX1</i>   | <i>HTT</i>     | <i>NPY</i>   | <i>RNF123</i>   | <i>UCN</i>      |
| <i>CACNA1C</i>             | <i>DISC1</i>    | <i>GRIA1</i>  | <i>IDO1</i>    | <i>NR3C1</i> | <i>RORA</i>     | <i>VEGFA</i>    |
| <i>CALM2</i>               | <i>DKK4</i>     | <i>GRIA3</i>  | <i>IFNG</i>    | <i>NR3C2</i> | <i>S100A10</i>  | <i>VGF</i>      |
| <i>CAMK2A</i>              | <i>DLG4</i>     | <i>GRID1</i>  | <i>IGF1</i>    | <i>NRG1</i>  | <i>S100B</i>    | <i>WFS1</i>     |
| <i>CARTPT</i>              | <i>DPP4</i>     | <i>GRIK3</i>  | <i>IL18</i>    | <i>NRXN1</i> | <i>SERPINA6</i> | <i>WWC1</i>     |
| <i>CDH13</i>               |                 |               |                |              |                 |                 |

**Table S4.** Gene Ontology (GO) Biological Process analysis on the potential targets of AL compounds.

| GO Biological Process                                                                | Related genes                                                 | Combined score |
|--------------------------------------------------------------------------------------|---------------------------------------------------------------|----------------|
| regulation of peptide hormone secretion (GO:0090276)                                 | <i>DPP4, IL6, NOS2, IL1B, TNF, ADRA2A</i>                     | 1678.71        |
| phospholipase C-activating G protein-coupled receptor signaling pathway (GO:0007200) | <i>CHRM2, HTR2A, DRD1, OPRM1, ESR1, ADRA2A</i>                | 1481.4         |
| positive regulation of acute inflammatory response (GO:0002675)                      | <i>IL6, IL1B, PTGS2, TNF</i>                                  | 5837.22        |
| regulation of insulin secretion (GO:0050796)                                         | <i>DPP4, IL6, NOS2, IL1B, TNF, ADRA2A</i>                     | 1048.31        |
| regulation of neuroinflammatory response (GO:0150077)                                | <i>IL6, IL1B, TNF, PTGS2</i>                                  | 4049.2         |
| cellular response to cytokine stimulus (GO:0071345)                                  | <i>GSK3B, IL6, NOS2, MAOA, IL1B, OPRM1, PTGS2, TNF, VEGFA</i> | 356.64         |
| positive regulation of gene expression (GO:0010628)                                  | <i>GSK3B, AR, IL6, NOS3, IL1B, DRD1, TNF, ADRA2A, VEGFA</i>   | 356.64         |
| regulation of protein secretion (GO:0050708)                                         | <i>DPP4, IL6, NOS2, IL1B, TNF, ADRA2A</i>                     | 811.96         |
| regulation of fever generation (GO:0031620)                                          | <i>IL1B, PTGS2, TNF</i>                                       | 20996.79       |
| positive regulation of glial cell proliferation (GO:0060252)                         | <i>IL6, IL1B, TNF</i>                                         | 20996.79       |

**Table S5.** Gene Ontology (GO) Molecular Function analysis on the potential targets of AL compounds.

| GO Molecular Function                                                                                         | Related genes                      | Combined score |
|---------------------------------------------------------------------------------------------------------------|------------------------------------|----------------|
| sodium:chloride symporter activity (GO:0015378)                                                               | <i>SLC6A2, SLC6A3, SLC6A4</i>      | 6149.17        |
| monoamine transmembrane transporter activity (GO:0008504)                                                     | <i>SLC6A2, SLC6A3, SLC6A4</i>      | 6149.17        |
| transmitter-gated ion channel activity involved in regulation of postsynaptic membrane potential (GO:1904315) | <i>CHRNA2, GABRA6, GABRA3</i>      | 1023.01        |
| RNA polymerase II general transcription initiation factor binding (GO:0001091)                                | <i>AR, ESR1</i>                    | 5570.3         |
| arginine binding (GO:0034618)                                                                                 | <i>NOS2, NOS3</i>                  | 2521.84        |
| receptor ligand activity (GO:0048018)                                                                         | <i>DPP4, IL6, TNF, IL1B, VEGFA</i> | 137.49         |
| benzodiazepine receptor activity (GO:0008503)                                                                 | <i>GABRA6, GABRA3</i>              | 1800.45        |
| cytokine activity (GO:0005125)                                                                                | <i>IL6, IL1B, TNF, VEGFA</i>       | 181.06         |
| extracellular ligand-gated ion channel activity (GO:0005230)                                                  | <i>GABRA6, GABRA3</i>              | 1566.22        |
| FMN binding (GO:0010181)                                                                                      | <i>NOS2, NOS3</i>                  | 1566.22        |

**Table S6.** Gene Ontology (GO) Cellular Component analysis on the potential targets of AL compounds.

| GO Cellular Component                              | Related genes                                                                                             | Combined score |
|----------------------------------------------------|-----------------------------------------------------------------------------------------------------------|----------------|
| neuron projection (GO:0043005)                     | <i>CHRM2, GSK3B, CHRNA2, GABRA3, HTR2A, OPRM1, PTGS2, SLC6A2, SLC6A3, SLC6A4</i>                          | 531.75         |
| integral component of plasma membrane (GO:0005887) | <i>CHRM2, CHRNA2, GABRA6, GABRA3, ADRB1, HTR2A, OPRM1, SLC6A2, TNF, SLC6A3, ADRA2A, SLC6A4, IL6, DRD1</i> | 260.27         |
| dendrite (GO:0030425)                              | <i>CHRM2, GSK3B, GABRA6, GABRA3, HTR2A, OPRM1</i>                                                         | 270.7          |
| GABA-A receptor complex (GO:1902711)               | <i>GABRA6, GABRA3</i>                                                                                     | 727.05         |
| dendrite membrane (GO:0032590)                     | <i>GABRA6, GABRA3</i>                                                                                     | 408.9          |
| organelle outer membrane (GO:0031968)              | <i>MAOA, MAOB, PTGS2</i>                                                                                  | 118.14         |
| membrane raft (GO:0045121)                         | <i>TNF, SLC6A3, SLC6A4</i>                                                                                | 96.63          |
| axon (GO:0030424)                                  | <i>GSK3B, OPRM1, SLC6A3</i>                                                                               | 69.22          |
| caveola (GO:0005901)                               | <i>NOS3, SLC6A3</i>                                                                                       | 151.87         |
| vesicle (GO:0031982)                               | <i>NOS2, NOS3, CALM2</i>                                                                                  | 59.26          |

**Table S7.** Kyoto Encyclopedia Genes and Genomes (KEGG) pathway analysis on the potential targets of AL compounds.

| KEGG pathway                                         | Related genes                                                           | Combined score |
|------------------------------------------------------|-------------------------------------------------------------------------|----------------|
| Neuroactive ligand-receptor interaction              | <i>CHRM2, CHRNA2, GABRA6, GABRA3, ADRB1, HTR2A, DRD1, OPRM1, ADRA2A</i> | 596.5          |
| Calcium signaling pathway                            | <i>CHRM2, NOS2, ADRB1, HTR2A, DRD1, CALM2, VEGFA</i>                    | 706.46         |
| Human cytomegalovirus infection                      | <i>GSK3B, IL6, IL1B, PTGS2, TNF, CALM2, VEGFA</i>                       | 535.28         |
| Dopaminergic synapse                                 | <i>GSK3B, MAOA, MAOB, DRD1, CALM2, SLC6A3</i>                           | 752.54         |
| Amphetamine addiction                                | <i>MAOA, MAOB, DRD1, CALM2, SLC6A3</i>                                  | 1153.67        |
| Pertussis                                            | <i>IL6, IL1B, NOS2, TNF, CALM2</i>                                      | 1009.69        |
| IL-17 signaling pathway                              | <i>GSK3B, IL6, IL1B, PTGS2, TNF</i>                                     | 752.7          |
| Pathways of neurodegeneration                        | <i>GSK3B, IL6, NOS2, IL1B, PTGS2, TNF, CALM2, SLC6A3</i>                | 258.09         |
| AGE-RAGE signaling pathway in diabetic complications | <i>IL6, NOS3, IL1B, TNF, VEGFA</i>                                      | 690.84         |
| C-type lectin receptor signaling pathway             | <i>IL6, IL1B, PTGS2, TNF, CALM2</i>                                     | 654.23         |
| Lipid and atherosclerosis                            | <i>GSK3B, IL6, NOS3, IL1B, TNF, CALM2</i>                               | 377.17         |
| Pathways in cancer                                   | <i>GSK3B, AR, IL6, NOS2, PTGS2, ESRI, CALM2, VEGFA</i>                  | 217.19         |
| Serotonergic synapse                                 | <i>MAOA, MAOB, HTR2, PTGS2, SLC6A4</i>                                  | 582.88         |
| Alzheimer disease                                    | <i>GSK3B, IL6, NOS2, IL1B, PTGS2, TNF, CALM2</i>                        | 259.22         |
| Cocaine addiction                                    | <i>MAOA, MAOB, DRD1, SLC6A3</i>                                         | 1054.52        |
| Arginine and proline metabolism                      | <i>MAOA, MAOB, NOS2, NOS3</i>                                           | 1025.6         |
| Fluid shear stress and atherosclerosis               | <i>NOS3, IL1B, TNF, CALM2, VEGFA</i>                                    | 436.1          |
| Leishmaniasis                                        | <i>NOS2, IL1B, PTGS2, TNF</i>                                           | 566.11         |
| Tuberculosis                                         | <i>IL6, NOS2, IL1B, TNF, CALM2</i>                                      | 302.01         |
| Alcoholism                                           | <i>MAOA, MAOB, DRD1, CALM2, SLC6A3</i>                                  | 288.11         |

**Table S8.** Docking scores of compounds in AL and potential targets.

| Compound                      | Docking score (kcal/mol) |      |        |       |      |      |       |        |      |
|-------------------------------|--------------------------|------|--------|-------|------|------|-------|--------|------|
|                               | CHMR2                    | ESR1 | GABRA3 | HTR2A | IL6  | NOS3 | PTGS2 | SCL6A4 | TNF  |
| 3 $\beta$ -acetoxyatractylone | -7.7                     | -    | -      | -6.8  | -    | -7.8 | -8.4  | -7.2   | -    |
| Atractylenolide I             | -                        | -    | -      | -     | -6.6 | -    | -     | -      | -7.7 |
| Atractylenolide II            | -                        | -    | -7.3   | -     | -    | -    | -     | -      | -    |
| Cyperene                      | -                        | -    | -      | -     | -    | -    | -7.0  | -      | -    |
| Patchoulene                   | -7.2                     | -    | -      | -     | -    | -    | -     | -      | -    |
| Selina-4(14),7(11)-dien-8-one | -7.1                     | -    | -6.7   | -     | -    | -    | -7.3  | -      | -    |
| Stigmasterol                  | -8.6                     | -    | -8.0   | -9.0  | -    | -    | -9.9  | -      | -    |
| Wogonin                       | -                        | -6.7 | -      | -     | -6.3 | -    | -8.0  | -      | -6.4 |
| $\beta$ -sitosterol           | -8.7                     | -    | -7.7   | -8.6  | -    | -    | -9.4  | -6.8   | -    |

## References

1. Jun, X.; Fu, P.; Lei, Y.; Cheng, P. Pharmacological effects of medicinal components of *Atractylodes lancea* (Thunb.) DC. *Chin. Med.* **2018**, *13*, 59.
2. Koonrungsesomboon, N.; Na-Bangchang, K.; Karbwang, J. Therapeutic potential and pharmacological activities of *Atractylodes lancea* (Thunb.) DC. *Asian Pac. J. Trop. Med.* **2014**, *7*, 421–428.
3. Cheng, Y.; Mai, J. Y.; Hou, T. L.; Ping, J.; Chen, J. J. Antiviral activities of atractylon from *Atractylodes Rhizoma*. *Mol. Med. Rep.* **2016**, *14*, 3704–3710.
